# Supplementary material for: Long-term study on coarse mode aerosols in the Amazon rain forest with the frequent intrusion of Saharan dust plumes
Source: Copernicus journal article supplement (doi:10.5194/acp-2017-1043), 2017-12-13
Supplement: Supplementary file [file acp-2017-1043-AC5-supplement.pdf]

Response to the referees (Daniel Moran-Zuloaga et al., Long-Term study on coarse mode aerosols in the Amazon rain forest with the frequent intrusion of Saharan dust plumes, ACP-2017-1043)

We thank Referee #2 for all the comments and suggestions that indeed will help us to improve the manuscript. The referees' comments and our responses are outlined in detail below:

[1.1] Referee comment: For most of figures: the authors preferred to differentiate curves in plots using different colors. There are recommendations to avoid this approach due to color-blinded readers. So, whenever possible, change and prefer figures using different gray tones and different line patterns (dot, crosses, diamonds, trace-dot, etc.). This is the case of the following figures in the manuscript: S1, S2a and S2b, S3, S4, S5, S6, S9, S12; 1, 2, 4a (colors), 4b-d (symbols are equal), 6, 7, 8 (use different symbols), 9, 10e-f.

Reference: <https://www.nature.com/articles/nmeth.1618>

Author Response: Thanks for pointing this out. We have modified the figures whenever possible. To keep the manuscript consistent with C. Pöhlker et al. (2018) we prefer to keep the original color code of the back trajectory clusters. In figures 4, 6, 8, S3, S7 (formerly S6), and S10 (formerly S9) different marker types were used. The colors in figures 1 and 7 were modified.

[1.2] Referee comment: 2) - C. Pöhlker et al. (2017) is cited several times in the text and is related to important features of this study. However, it is in reference list as "to be submitted". It is not correct to use so often a paper that is not even submitted. The same holds for Saturno et al. (2017) despite it is much less cited than C. Pöhlker et al. 2017

Author Response: The studies have been submitted in the meantime and corresponding references have been updated as follows:

- Saturno, J., Ditas, F., Penning de Vries, M., Holanda, B. A., Pöhlker, M. L., Carbone, S., Walter, D., Bobrowski, N., Brito, J., Chi, X., Gutmann, A., Hrabě de Angelis, I., Machado, L. A. T., Moran-Zuloaga, D., Rüdiger, J., Schneider, J., Schulz, C., Wang, Q., Wendisch, M., Artaxo, P., Wagner, T., Pöschl, U., Andreae, M. O., and Pöhlker, C.: African volcanic emissions influencing atmospheric aerosol particles over the Amazon rain forest, *Atmos. Chem. Phys. Discuss.*, 2017, 1-32, 10.5194/acp-2017-1152, 2017a.
- Saturno, J., Holanda, B. A., Pöhlker, C., Ditas, F., Wang, Q., Moran-Zuloaga, D., Brito, J., Carbone, S., Cheng, Y., Chi, X., Ditas, J., Hoffmann, T., Hrabě de Angelis, I., Könemann, T., Lavrič, J. V., Ma, N., Ming, J., Paulsen, H., Pöhlker, M. L., Rizzo, L. V., Schlag, P., Su, H., Walter, D., Wolff, S., Zhang, Y., Artaxo, P., Pöschl, U., and Andreae, M. O.: Black and brown carbon over central Amazonia: Long-term aerosol measurements at the ATTO site, *Atmos. Chem. Phys. Discuss.*, 2017, 1-57, 10.5194/acp-2017-1097, 2017b.
- Pöhlker, C., Walter, D., Paulsen, H., Könemann, T., Rodríguez-Caballero, E., Moran-Zuloaga, D., Brito, J., Carbone, S., Degrendele, C., Després, V., Ditas, F., Holanda, B., Kaiser, J. W., Lammel, G., Lavrič, J. V., Ming, J., Pickersgill, D., Pöhlker, M., Praß, M., Ruckteschler, N., Saturno, J., Sörgel, M., Wang, Q., Weber, B., Wolff, S., Artaxo, P., Pöschl, U., and Andreae, M. O.: Land cover and its transformation in the backward trajectory footprint of the Amazon Tall Tower Observatory, *Atmospheric Chemistry and Physics*, acp-2018-323, submitted, 2018.

[1.3] Referee comment: - Change "Amazonian" to "amazonian" (first letter lower case) in the whole text. Amazonian is an adjective, not a location. Amazon is a location.

Author Response: In numerous landmark papers focusing on Amazon research, "Amazonian" is used capitalized (e.g., Cochrane and Laurance, 2008; Martin et al., 2010; Davidson et al., 2012; Andreae et al., 2015). We are convinced that this is correct. If not, it will be corrected by ACP's copyeditor.

[1.4] Referee comment: - p.5 lines 1 and 5: the author refers to "winter dust plumes". It is confusing because the manuscript is dealing with a phenomenon that happens in both hemispheres. Winter in one

hemisphere is summer in the other. Instead use the name of specific months you are referring. Another option, use wet or dry season (with respect to Central Amazonia) whose months are well known.

Author Response: Agree. We have replaced “winter dust plumes” by “the wet season dust plumes”.

[1.5] Referee comment: - p.5 lines 34 and 36: repeated to close in the text the expression "whether and to what extent".

Author Response: Agree. We deleted the “whether and” and replaced by "Furthermore, to what extent".

[1.6] Referee comment: - p.13 line 28: "NE basin" to "NE Amazon Basin".

Author Response: Done. “Amazon” has been added.

[1.7] Referee comment: - p.15 line 12:  $P_{BT}$  was not defined before.

Author Response: We have added the following sentence to the experimental section (p. 10, line 13) to define  $P_{BT}$ :

“Furthermore, the cumulative precipitation along the back trajectory tracks,  $P_{BT}$ , has been calculated based on the HYSPLIT model output.”

[1.8] Referee comment: - p.16 last line: there is no meaning in  $M_{BCe} = 0.02 \pm 0.03$ . This discrepancy is due to the use of Standard Deviation in non-normal data. Use median and Interquartile Range to avoid negative values in the confidence interval.

Author Response: We have replace the mean +/- standard deviation by median with interquartile range (difference between 75 % and 25 % percentiles) throughout the text. Accordingly, the original paragraph in Sect. 3.1, on page 16:

“... the wet season shows clean background concentrations (i.e.,  $N_{total} = 336 \pm 209 \text{ cm}^{-3}$  and  $M_{BCe} = 0.02 \pm 0.03 \text{ } \mu\text{g m}^{-3}$ , mean  $\pm 1$  std. dev.), whereas highest concentration levels occur in the dry season (i.e.,  $N_{total} = 1508 \pm 785 \text{ cm}^{-3}$  and  $M_{BCe} = 0.35 \pm 0.20 \text{ } \mu\text{g m}^{-3}$ ). The transitions periods represent an intermediate state in between these extremes (i.e.,  $N_{total} = 790 \pm 547 \text{ cm}^{-3}$  and  $M_{BCe} = 0.17 \pm 0.20 \text{ } \mu\text{g m}^{-3}$ ). During the LRT season, we observed a clear  $M_{BCe}$  enhancement in comparison to the wet season background (i.e.,  $M_{BCe} = 0.17 \pm 0.15 \text{ } \mu\text{g m}^{-3}$  vs.  $M_{BCe} = 0.02 \pm 0.03 \text{ } \mu\text{g m}^{-3}$ ), ...”

has been replaced by

“... the wet season shows clean background concentrations [i.e., median with interquartile range, IQR (25<sup>th</sup>–75<sup>th</sup> percentiles):  $N_{total} = 283 (197\text{--}420) \text{ cm}^{-3}$  and  $M_{BCe} = 0.02 (0.02\text{--}0.04) \text{ } \mu\text{g m}^{-3}$ ], whereas highest concentration levels occur in the dry season [i.e.,  $N_{total} = 1337 (1021\text{--}1776) \text{ cm}^{-3}$  and  $M_{BCe} = 0.30 (0.21\text{--}0.46) \text{ } \mu\text{g m}^{-3}$ ]. The transitions periods represent an intermediate state in between these extremes [i.e.,  $N_{total} = 663 (448\text{--}963) \text{ cm}^{-3}$  and  $M_{BCe} = 0.10 (0.05\text{--}0.20) \text{ } \mu\text{g m}^{-3}$ ]. During the LRT season, we observed a clear  $M_{BCe}$  enhancement in comparison to the wet season background [i.e.,  $M_{BCe} = 0.14 (0.05\text{--}0.24) \text{ } \mu\text{g m}^{-3}$  vs.  $M_{BCe} = 0.02 (0.02\text{--}0.04) \text{ } \mu\text{g m}^{-3}$ ] ...”

Also in section 3.2, on page 17:

“The  $N_{1-10}$  and  $M_{1-10}$  levels show a modest increases from the wet season ( $N_{1-10} = 0.42 \pm 0.34 \text{ cm}^{-3}$ ,  $M_{1-10} = 4.04 \pm 2.72 \text{ } \mu\text{g m}^{-3}$ ) over the transition periods ( $N_{1-10} = 0.81 \pm 0.75 \text{ cm}^{-3}$ ,  $M_{1-10} = 5.24 \pm 3.46 \text{ } \mu\text{g m}^{-3}$ ) to the dry season ( $N_{1-10} = 1.15 \pm 0.81 \text{ cm}^{-3}$ ,

$M_{1-10} = 6.47 \pm 2.69 \mu\text{g m}^{-3}$ ). The highest  $N_{1-10}$  and  $M_{1-10}$  levels clearly occurred during African LRT influence ( $N_{1-10} = 2.03 \pm 1.87 \text{ cm}^{-3}$ ,  $M_{1-10} = 11.28 \pm 9.05 \mu\text{g m}^{-3}$ )."

has been updated to:

"The wet season [ $N_{1-10} = 0.3$  (0.2-0.5)  $\text{cm}^{-3}$ ,  $M_{1-10} = 3.5$  (2.2-5.4)  $\mu\text{g m}^{-3}$ ] over the transition periods [ $N_{1-10} = 0.7$  (0.4-1.0)  $\text{cm}^{-3}$ ,  $M_{1-10} = 4.9$  (3.4-6.5)  $\mu\text{g m}^{-3}$ ]; meanwhile during the dry season [ $N_{1-10} = 1.1$  (0.8-1.4)  $\text{cm}^{-3}$ ,  $M_{1-10} = 6.4$  (4.9-7.8)  $\mu\text{g m}^{-3}$ ]. The highest concentrations for  $N_{1-10}$  and  $M_{1-10}$  levels clearly occurred during African LRT influence [ $N_{1-10} = 1.5$  (0.6-2.8)  $\text{cm}^{-3}$ ,  $M_{1-10} = 9.1$  (5.2-14.2)  $\mu\text{g m}^{-3}$ ] respectively"

[1.9] Referee comment: - p.19 lines 18-20: "We propose that the results obtained here for the year 2014 can be regarded as representative for a typical dust deposition scenario in the Amazon region, since 2014 was generally an 'average' year without 20 pronounced precipitation and circulation anomalies (M. Pöhlker et al., 2016; C. Pöhlker et al., 2017)." »>To state that 2014 was an "average year" is a strong affirmation, and should not use a "to be submitted" reference for such an assumption.

Author Response: The fact, that the year 2014 was an "average year" in terms of precipitation is shown and discussed in detail in M. Pöhlker et al., (2016). The manuscript by C. Pöhlker et al. (2018), which provides further details on hydrology and circulation patterns, has been submitted in the meantime and the following reference has been added:

- Pöhlker, C., Walter, D., Paulsen, H., Könemann, T., Rodríguez-Caballero, E., Moran-Zuloaga, D., Brito, J., Carbone, S., Degrendele, C., Després, V., Ditas, F., Holanda, B., Kaiser, J. W., Lammel, G., Lavric, J. V., Ming, J., Pickersgill, D., Pöhlker, M., Praß, M., Ruckteschler, N., Saturno, J., Sörgel, M., Wang, Q., Weber, B., Wolff, S., Artaxo, P., Pöschl, U., and Andreae, M. O.: Land cover and its transformation in the backward trajectory footprint of the Amazon Tall Tower Observatory, Atmospheric Chemistry and Physics, acp-2018-323, submitted, 2018.

[1.10] Referee comment: References: Rizzolo et al. (2016) was already published as final revised article in ACP: see <https://www.atmos-chem-phys.net/17/2673/2017/acp-17-2673-2017.pdf> and update it.

Author Response: Thanks for pointing this out. The reference has been update:

- Rizzolo, J. A., Barbosa, C. G. G., Borillo, G. C., Godoi, A. F. L., Souza, R. A. F., Andreoli, R. V., Manzi, A. O., Sá, M. O., Alves, E. G., Pöhlker, C., Angelis, I. H., Ditas, F., Saturno, J., Moran-Zuloaga, D., Rizzo, L. V., Rosário, N. E., Pauliquevis, T., Santos, R. M. N., Yamamoto, C. I., Andreae, M. O., Artaxo, P., Taylor, P. E., and Godoi, R. H. M.: Soluble iron nutrients in Saharan dust over the central Amazon rainforest, Atmos. Chem. Phys., 17, 2673-2687, 10.5194/acp-17-2673-2017, 2017.

[1.11] Referee comment: - Figure 2: it contains a lot of information in a single figure and it is somehow confusing to understand author's analysis and discussions due to the small size of curves. Improve it separating in different figures with larger sizes.

This figure also cites figure S4. To understand the figure it is mandatory to the reader to see supplement. So, it should not be in the supplement but in the main text. The same holds for Figure 3, 4, 9, 14. Also, (c) lacks BC equivalent in legend.

Author Response: The Fig. 2 underwent various iterations and changes in the course of the preparation of the manuscript. The main purpose of this figure is to directly compare the variability of the key time series. We are not sure if this works well after splitting the figure. Regarding the reference to Fig. S4, we added a legend into Fig. 2, which provides the essential information (wind directions of back

trajectories). Thus, it is not mandatory any more to refer to the supplement. The BC equivalent has been added to the legend in Fig. 2c.

[1.12] Referee comment: - Figure 4: (a) very confusing to understand the actual meaning of colors in the figure. (c) and (e): change the experimental point symbol for the sake of clarity

Author Response: We have changed the markers as requested. We also added a legend that specifies the back trajectory cluster colors.

[1.13] Referee comment: - Figure 5: here you explain  $M_{BCe}$ , but it was previously used in Fig. 4 without any explanation. So, move it to previous figure.

Author Response: We specified the pollution tracer also in the caption of Fig. 4 as follows: "Pollution tracers  $BC_e$  mass concentration,  $M_{BCe}$ , and carbon monoxide mole fraction,  $c_{CO}$ ."

[1.14] Referee comment: - Figure 8: why some points show negative slope, with slope +/- uncertainty not compatible with zero?

Author Response: We have checked all six data points with a negative  $M_{10-1}/M_{BCe}$  slope carefully. It turned out that three data points (i.e., the two lowest of 2014 and the lowest of 2015) have data interruptions of the  $M_{BCe}$  and  $M_{10-1}$  time series. It appears that the negative slopes resulted from the data gaps. These data points were removed from Fig. 8. The other three data points appear to be true outliers. In these cases, the  $M_{BCe}$  was exceptionally low. These data points were left in Fig. 8.

[1.15] Referee comment: - Figure 9: in the upper legend it cites Moran et al. (in preparation). Not adequate.

Author Response: The reference has been removed.

[1.16] Referee comment: - Figure 11: include in caption the meaning of gray areas in the map.

Author Response: For clarification, the following sentence has been added to the captions of Fig. 11 and Fig. S10: "The gray areas represent pixels with no satellite data for the corresponding time periods. "

[1.17] Referee comment: - Figure 12: in the caption: "are show overlay" > "are shown overlay"... and (b) actually refers to figure (d).

Author Response: True. The typos have been corrected.

[1.18] Referee comment: - Figure 13, in caption: did you mean "NCEP Reanalysis" when writing "NCEP satellite"?

Author Response: Correct – thanks. We have changes "NCEP satellite" to "NCEP reanalysis".

[1.19] Referee comment: Supplementary material: The manuscript cites too often figures containing in supplementary material. If a figure has to be cited frequently and it is important to the actual

comprehension of the article context of the article it should be moved to the main text. This is the case of figures S4, S6 and S9, which should be inserted in the principal text.

Author Response: In general, we tried to put as many non-essential figures to the supplement as possible to keep the main text (which is already rather long) as short and concise as possible. Referring to the suggestion by the referee: A legend that specifies the color code in Fig. S4 has been added to the main text Figure 2, 4, and 9. Accordingly, it should not be necessary any more to refer to Fig. S4. The Fig. S6 is mentioned in the main text once and is not needed to follow the argumentation. Figure S9 is the overview figure of the second case study. The key results are discussed by means of the first case study, which is entirely placed in the main text. Case study 2 has been added to the supplement since it does not provide new aspects, but rather broadens the data basis and underlines certain aspects for readers that are interested in further details. Accordingly, we are convinced that all figures that are essential to follow the argumentation have been placed in the main text.

[1.20] Referee comment: Figure S2: at figure (c) the fitting seems to have forced parameter  $a = 0$ . It should be explained and/or justified it. Visual (separately) inspection of black and white experimental points does not seem to be statistically compatible with zero.

Author Response: That is correct, the correlation has been forced through zero, mainly due to the rather small number of data point in the correlation plots. Moreover, both techniques have been validated to deliver zero in the absence of aerosol particles, which emphasizes that no axis intercept is expected. We added the following statement to the caption of Figure S2:

“Linear regression fits (forced through zero) for both periods in (c) confirm overall agreement of both techniques.”

[1.21] Referee comment: Figure S9: Really hard to understand the meaning of colors in part (b).

Author Response: We have added a legend (similar to Figures 2, 4, and 9) that specifies the wind directions of the backward trajectories and may help to increase readability.
